# Supplementary material
Source: HighWire-hosted journal article supplement (https://erj.ersjournals.com/content/57/4/2001549)
Supplement: inline-supplementary-material-1 [file inline-supplementary-material-1.pdf]

# Appendix 1. Clinical and lung cancer characteristics of patients included in unforeseen N2 and survival analyses per diagnosis year (n=21,409)

|                                  | 2005  | 2006  | 2007  | 2008  | 2009  | 2010  | 2011  | 2012  | 2013  | 2014  | 2015  | 2016  | 2017  | $\chi^2$ | Trend | Spearman |
|----------------------------------|-------|-------|-------|-------|-------|-------|-------|-------|-------|-------|-------|-------|-------|----------|-------|----------|
| Number of patients               | 1,434 | 1,442 | 1,536 | 1,481 | 1,593 | 1,610 | 1,725 | 1,681 | 1,783 | 1,694 | 1,827 | 1,779 | 1,824 | -        | -     | -        |
| Age, median                      | 66    | 66    | 66    | 66    | 67    | 67    | 66    | 66    | 66    | 67    | 67    | 67    | 68    | -        | -     | -        |
| Male gender, %                   | 67    | 63    | 64    | 61    | 63    | 62    | 60    | 57    | 58    | 57    | 56    | 54    | 54    | -        | ↓     | <.01     |
| Clinical nodal stage, %          |       |       |       |       |       |       |       |       |       |       |       |       |       |          |       |          |
| cN0                              | 86    | 82    | 82    | 82    | 81    | 84    | 84    | 84    | 83    | 83    | 82    | 82    | 83    | <.01     | -     | .56      |
| cN1                              | 5     | 7     | 8     | 8     | 10    | 9     | 9     | 9     | 10    | 11    | 12    | 13    | 12    |          | ↑     | .01      |
| cN2                              | 3     | 4     | 4     | 4     | 4     | 4     | 3     | 4     | 4     | 3     | 3     | 3     | 3     |          | -     | .09      |
| cN3                              | 0     | 0     | 1     | 0     | 0     | 0     | 1     | 0     | 0     | 0     | 0     | 0     | 1     |          | -     | .75      |
| cNx                              | 6     | 7     | 7     | 6     | 5     | 3     | 3     | 3     | 3     | 2     | 3     | 2     | 1     |          | ↓     | <.01     |
| Tumour location, %               |       |       |       |       |       |       |       |       |       |       |       |       |       |          |       |          |
| Right upper lobe                 | 32    | 36    | 31    | 34    | 32    | 33    | 34    | 34    | 36    | 33    | 32    | 33    | 32    | .13      | -     | .82      |
| Right middle lobe                | 4     | 4     | 4     | 5     | 4     | 4     | 5     | 4     | 4     | 5     | 5     | 5     | 5     |          | ↑     | .02      |
| Right lower lobe                 | 19    | 17    | 18    | 18    | 20    | 18    | 18    | 18    | 18    | 17    | 19    | 18    | 20    |          | -     | .55      |
| Left upper lobe                  | 30    | 27    | 30    | 28    | 27    | 27    | 28    | 29    | 28    | 30    | 28    | 27    | 27    |          | -     | .35      |
| Left lower lobe                  | 15    | 15    | 16    | 15    | 16    | 19    | 15    | 14    | 14    | 16    | 15    | 17    | 17    |          | -     | .54      |
| Histopathology, %                |       |       |       |       |       |       |       |       |       |       |       |       |       |          |       |          |
| Adenocarcinoma                   | 37    | 37    | 37    | 39    | 38    | 41    | 41    | 45    | 46    | 45    | 46    | 48    | 35    | <.01     | ↑     | .04      |
| Squamous cell carcinoma          | 40    | 42    | 41    | 38    | 40    | 39    | 40    | 36    | 36    | 33    | 35    | 33    | 31    |          | ↓     | <.01     |
| NSCLC not further specified      | 4     | 5     | 5     | 5     | 5     | 5     | 5     | 8     | 7     | 11    | 9     | 8     | 19    |          | ↑     | <.01     |
| Neuro endocrine                  | 2     | 2     | 2     | 2     | 2     | 2     | 2     | 3     | 3     | 3     | 2     | 3     | 2     |          | -     | .09      |
| Large cell carcinoma             | 8     | 8     | 6     | 6     | 4     | 2     | 2     | 1     | 1     | 1     | 1     | 1     | 0     |          | ↓     | <.01     |
| Adenosquamous carcinoma          | 2     | 2     | 2     | 2     | 2     | 2     | 2     | 1     | 1     | 2     | 1     | 2     | 2     |          | -     | .25      |
| Bronchoalveolar cell             | 6     | 6     | 7     | 8     | 9     | 9     | 7     | 5     | 5     | 6     | 5     | 6     | 11    |          | -     | .88      |
| Mediastinal nodal staging, %     |       |       |       |       |       |       |       |       |       |       |       |       |       |          |       |          |
| No invasive staging              | 74    | 71    | 76    | 74    | 77    | 75    | 67    | 66    | 64    | 65    | 61    | 60    | 60    | <.01     | ↓     | <.01     |
| Endosonography only              | N/A   | N/A   | N/A   | N/A   | N/A   | N/A   | 9     | 11    | 13    | 15    | 17    | 18    | 19    |          | ↑     | <.01     |
| Endosonography + mediastinoscopy | N/A   | N/A   | N/A   | N/A   | N/A   | N/A   | 9     | 11    | 10    | 10    | 12    | 12    | 13    |          | -     | .01      |
| Mediastinoscopy only             | 26    | 29    | 24    | 26    | 23    | 25    | 15    | 12    | 13    | 10    | 10    | 10    | 8     |          | ↓     | <.01     |
| Adjuvant therapy, %              | 22    | 25    | 25    | 29    | 32    | 33    | 35    | 32    | 28    | 29    | 28    | 25    | 27    | -        | -     | .54      |

$\chi^2$ =Chi-squared test p-value; trend=↑=increasing trend; ↓=decreasing trend; - =stable trend; Spearman=Spearman's rank correlation coefficient p-value; cN=clinical nodal stage; N/A=not available;
